# Supplementary material
Source: PubMed Central journal article supplement (PMC7747217)

Fig. S1

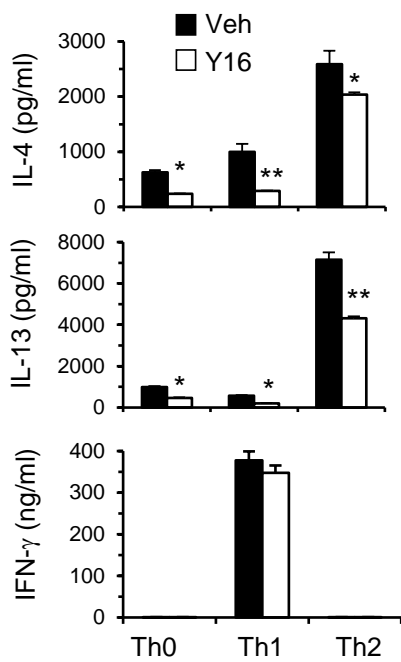

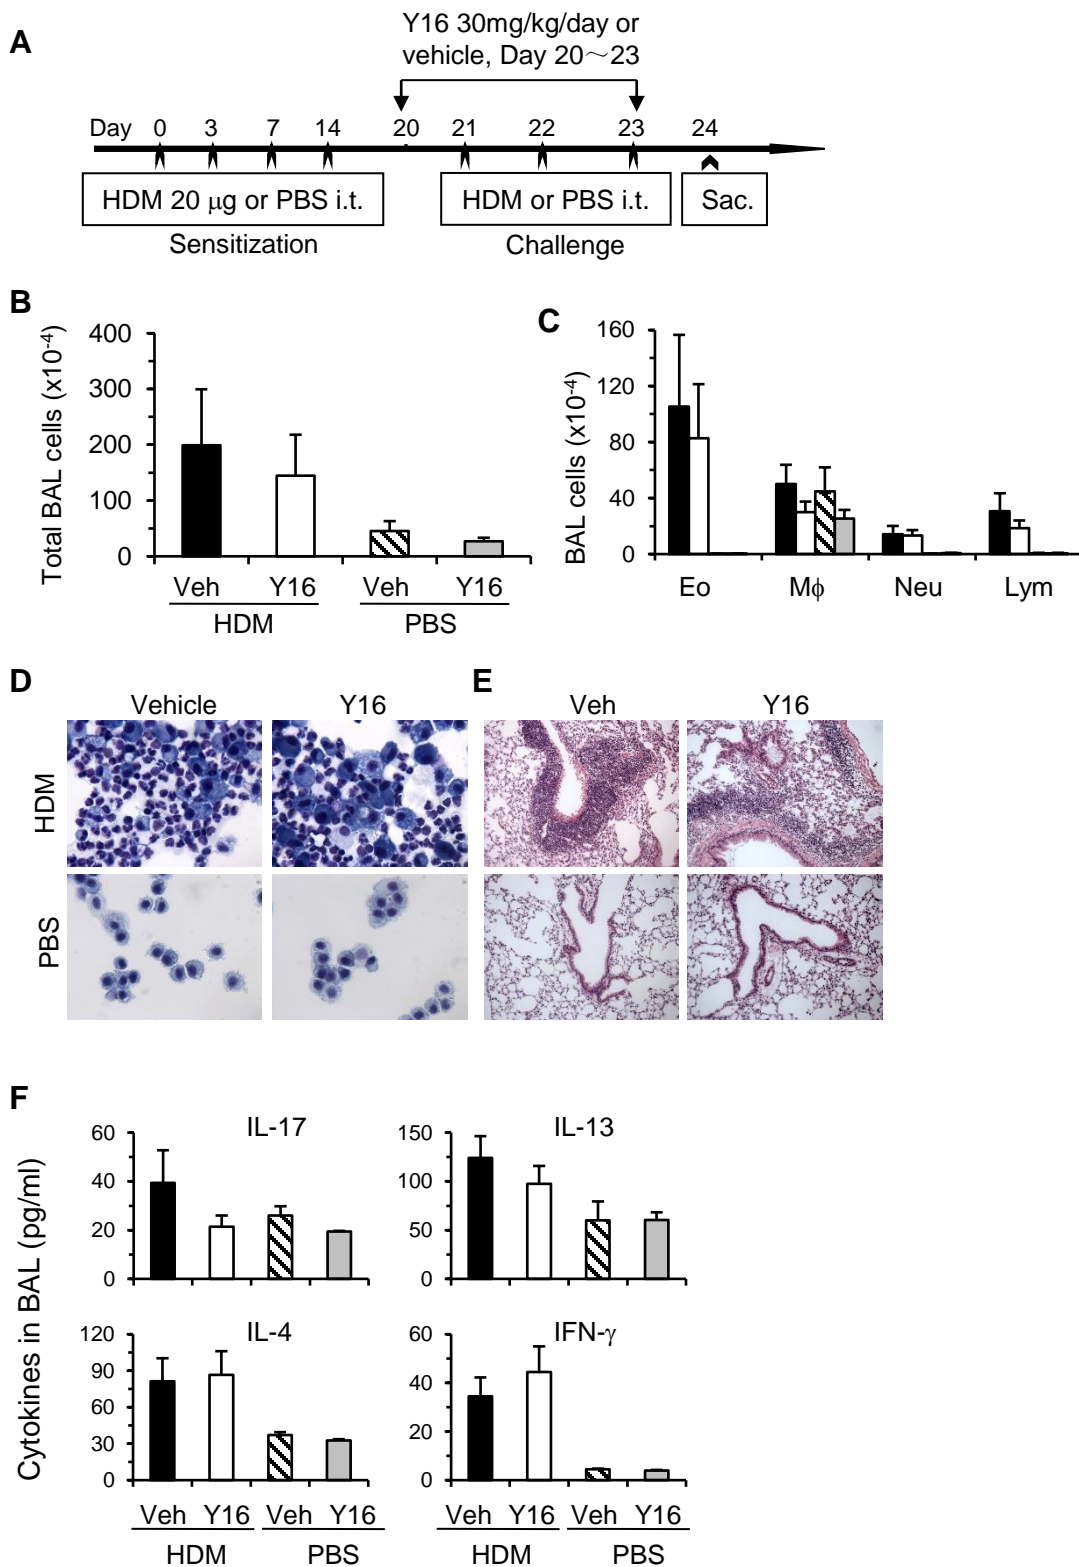

Supplement: NIHMS1652310-supplement-Supp.pdf [file NIHMS1652310-supplement-Supp.pdf]
